# Supplementary material
Source: publisher site journal article supplement (https://www.dovepress.com/article/410657)
Supplement: Supplementary file 1 [file get_supplementary_file.php]

**Supplementary material**

**Table S1** Characteristics analysis of carbapenemase-encoding genes, capsular polysaccharide serotyping and virulence-associated genes of CRKP strains

| **Strain #** | **Carbapenemase-encoding genes** | **Capsular polysaccharide serotypes (*wzi* alleles)** | **Virulence-associated genes** | **Drug resistance**a |
| --- | --- | --- | --- | --- |
| CRKP1 | *bla*KPC | K2 (*wzi*-72) | *irp*2*+iuc*A*+iro*B*+crmp*A | / |
| CRKP2 | *bla*KPC | K14.K64 (*wzi*-64) | *irp*2*+rmp*A2*+peg*589*+iuc*A*+ter*B*+peg*1631 | MDR |
| CRKP3 | *bla*KPC | K14.K64 (*wzi-*64) | *irp*2*+rmp*A2*+peg*589*+iuc*A*+ter*B*+peg*1631 | / |
| CRKP4 | *bla*KPC | K14.K64 (*wzi-*64) | *irp*2*+rmp*A2*+peg*589*+iuc*A*+ter*B*+peg*1631 | MDR |
| CRKP5 | *bla*KPC | K14.K64 (*wzi-*64) | *irp*2*+rmp*A2*+peg*589*+iuc*A*+ter*B*+peg*1631*+peg*344 | MDR |
| CRKP6 | *bla*KPC | K14.K64 (*wzi-*64) | *irp*2*+rmp*A2*+peg*589*+iuc*A*+ter*B*+peg*1631*+peg*344 | MDR |
| CRKP7 | *bla*KPC | K14.K64 (*wzi-*64) | *irp*2*+rmp*A2*+peg*589*+iuc*A*+ter*B*+peg*1631*+peg*344 | / |
| CRKP8 | *bla*KPC | K14.K64 (*wzi-*64) | *irp*2*+rmp*A2*+peg*589*+iuc*A*+ter*B*+peg*1631*+peg*344 | / |
| CRKP9 | *bla*KPC | K14.K64 (*wzi-*64) | *irp*2*+rmp*A2*+peg*589*+iuc*A*+ter*B*+peg*1631*+rmp*A | MDR |
| CRKP10 | *bla*KPC | K14.K64 (*wzi-*64) | *irp*2*+rmp*A2*+peg*589*+iuc*A*+ter*B*+peg*1631*+rmp*A | MDR |
| CRKP11 | *bla*KPC | K14.K64 (*wzi-*64) | *irp*2*+rmp*A2*+peg*589*+iuc*A*+ter*B*+peg*1631*+rmp*A | / |
| CRKP12 | *bla*KPC | K14.K64 (*wzi-*64) | *irp*2*+rmp*A2*+peg*589*+iuc*A*+ter*B*+peg*1631*+rmp*A | MDR |
| CRKP13 | *bla*KPC | K14.K64 (*wzi-*64) | *irp*2*+rmp*A2*+peg*589*+iuc*A*+ter*B*+peg*1631*+rmp*A | MDR |
| CRKP14 | *bla*KPC | K14.K64 (*wzi*-64) | *irp*2*+rmp*A2*+peg*589*+iuc*A*+ter*B*+peg*1631*+rmp*A | / |
| CRKP15 | *bla*KPC | K14.K64 (*wzi-*64) | *irp*2*+rmp*A2*+peg*589*+iuc*A*+ter*B*+peg*1631*+rmp*A | MDR |
| CRKP16 | *bla*KPC | K14.K64 (*wzi-*64) | *irp*2*+rmp*A2*+peg*589*+iuc*A*+ter*B*+peg*1631*+rmp*A*+peg*344 | MDR |
| CRKP17 | *bla*KPC | K14.K64 (*wzi-*64) | *irp*2*+rmp*A2*+peg*589*+iuc*A*+ter*B*+peg*1631*+rmp*A*+peg*344 | / |
| CRKP18 | *bla*KPC | K14.K64 (*wzi-*64) | *irp*2*+rmp*A2*+peg*589*+iuc*A*+ter*B*+peg*1631*+rmp*A*+peg*344 | / |
| CRKP19 | *bla*KPC | K14.K64 (*wzi-*64) | *irp*2*+rmp*A2*+peg*589*+iuc*A*+ter*B*+peg*1631*+rmp*A*+peg*344 | MDR |
| CRKP20 | *bla*KPC | K14.K64 (*wzi-*64) | *irp*2*+rmp*A2*+peg*589*+iuc*A*+ter*B*+peg*1631*+rmp*A*+peg*344 | / |
| CRKP21 | *bla*KPC | K14.K64 (*wzi-*64) | *irp*2*+rmp*A2*+peg*589*+iuc*A*+ter*B*+peg*1631*+rmp*A*+peg*344 | MDR |
| CRKP22 | *bla*KPC | K14.K64 (*wzi-*64) | *irp*2*+rmp*A2*+peg*589*+iuc*A*+ter*B*+peg*1631*+rmp*A*+peg*344 | / |
| CRKP23 | *bla*KPC | K14.K64 (*wzi-*64) | *irp*2*+rmp*A2*+peg*589*+iuc*A*+ter*B*+peg*1631*+rmp*A*+peg*344 | MDR |
| CRKP24 | *bla*KPC | K14.K64 (*wzi-*64) | *irp*2*+rmp*A2*+peg*589*+iuc*A*+ter*B*+peg*1631*+rmp*A*+peg*344 | / |
| CRKP25 | *bla*KPC | K14.K64 (*wzi-*64) | *irp*2*+rmp*A2*+peg*589*+iuc*A*+ter*B*+peg*1631*+rmp*A*+peg*344 | MDR |
| CRKP26 | *bla*KPC | K14.K64 (*wzi-*64) | *irp*2*+rmp*A2*+peg*589*+iuc*A*+ter*B*+peg*1631*+rmp*A*+peg*344 | MDR |
| CRKP27 | *bla*KPC | K14.K64 (*wzi-*64) | *irp*2*+rmp*A2*+peg*589*+iuc*A*+ter*B*+peg*1631*+rmp*A*+peg*344 | MDR |
| CRKP28 | *bla*KPC | K14.K64 (*wzi-*64) | *irp*2*+rmp*A2*+peg*589*+iuc*A*+ter*B*+peg*1631*+rmp*A*+peg*344 | / |
| CRKP29 | *bla*KPC | K14.K64 (*wzi-*64) | *irp*2*+rmp*A2*+peg*589*+ter*B*+peg*1631 | MDR |
| CRKP30 | *bla*KPC | K14.K64 (*wzi-*64) | *irp*2*+rmp*A2*+peg*589*+ter*B*+peg*1631*+rmp*A | MDR |
| CRKP31 | *bla*KPC | K14.K64 (*wzi-*64) | *irp*2*+rmp*A2*+rmp*A*+peg*344 | / |
| CRKP32 | *bla*KPC | K19 (*wzi-*19) | *irp*2 | / |
| CRKP33 | *bla*KPC | K19 (*wzi-*19) | *irp*2 | / |
| CRKP34 | *bla*KPC | K19 (*wzi-*19) | *irp*2 | / |
| CRKP35 | *bla*KPC | K19 (*wzi-*19) | *irp*2 | MDR |
| CRKP36 | *bla*KPC | K19 (*wzi-*19) | *irp*2 | / |
| CRKP37 | *bla*KPC | K19 (*wzi-*19) | *irp*2 | / |
| CRKP38 | *bla*KPC | K19 (*wzi-*19) | *irp*2 | MDR |
| CRKP39 | *bla*KPC | K19 (*wzi-*19) | *irp*2 | MDR |
| CRKP40 | *bla*KPC | K19 (*wzi-*19) | *irp*2 | / |
| CRKP41 | *bla*KPC | K19 (*wzi-*19) | *irp*2 | MDR |
| CRKP42 | *bla*KPC | K19 (*wzi-*19) | *irp*2*+rmp*A | MDR |
| CRKP43 | *bla*KPC | K19 (*wzi-*19) | *irp*2*+rmp*A2 | MDR |
| CRKP44 | *bla*KPC | K19 (*wzi-*19) | *irp*2*+ter*B | MDR |
| CRKP45 | *bla*KPC | K35 (*wzi-*162) | *irp*2*+rmp*A2*+peg*589*+iuc*A*+ter*B*+peg*1631 | MDR |
| CRKP46 | *bla*KPC | KL102/KL149/KL155 (*wzi-*173) | *irp*2 | / |
| CRKP47 | *bla*KPC | KL102/KL149/KL155 (*wzi-*173) | *irp*2 | / |
| CRKP48 | *bla*KPC | KL47 (*wzi-*209) | *irp*2 | MDR |
| CRKP49 | *bla*KPC | KL47 (*wzi-*209) | *irp*2 | MDR |
| CRKP50 | *bla*KPC | KL47 (*wzi-*209) | *irp*2 | MDR |
| CRKP51 | *bla*KPC | KL47 (*wzi-*209) | *irp*2*+rmp*A2*+peg*589*+iuc*A | MDR |
| CRKP52 | *bla*KPC | KL47 (*wzi-*209) | *irp*2*+rmp*A2*+peg*589*+iuc*A | MDR |
| CRKP53 | *bla*KPC | KL47 (*wzi-*209) | *irp*2*+rmp*A2*+peg*589*+iuc*A | MDR |
| CRKP54 | *bla*KPC | KL47 (*wzi-*209) | *irp*2*+rmp*A2*+peg*589*+iuc*A | / |
| CRKP55 | *bla*KPC | KL47 (*wzi-*209) | *irp*2*+rmp*A2*+peg*589*+iuc*A | MDR |
| CRKP56 | *bla*KPC | KL47 (*wzi-*209) | *irp*2*+rmp*A2*+peg*589*+iuc*A*+ter*B | / |
| CRKP57 | *bla*KPC | KL47 (*wzi-*209) | *irp*2*+rmp*A2*+peg*589*+iuc*A*+ter*B*+peg*1631 | MDR |
| CRKP58 | *bla*KPC | KL47 (*wzi-*209) | *irp*2*+rmp*A2*+peg*589*+iuc*A*+ter*B*+peg*1631 | / |
| CRKP59 | *bla*KPC | KL47 (*wzi-*209) | *irp*2*+rmp*A2*+peg*589*+iuc*A*+ter*B*+peg*1631 | / |
| CRKP60 | *bla*KPC | KL47 (*wzi-*209) | *irp*2*+rmp*A2*+peg*589*+iuc*A*+ter*B*+peg*1631 | MDR |
| CRKP61 | *bla*KPC | KL47 (*wzi-*209) | *irp*2*+rmp*A2*+peg*589*+iuc*A*+ter*B*+peg*1631 | MDR |
| CRKP62 | *bla*KPC | KL47 (*wzi-*209) | *irp*2*+rmp*A2*+peg*589*+iuc*A*+ter*B*+peg*1631 | MDR |
| CRKP63 | *bla*KPC | KL47 (*wzi-*209) | *irp*2*+rmp*A2*+peg*589*+iuc*A*+ter*B*+peg*1631 | MDR |
| CRKP64 | *bla*KPC | KL47 (*wzi-*209) | *irp*2*+rmp*A2*+peg*589*+iuc*A*+ter*B*+peg*1631 | MDR |
| CRKP65 | *bla*KPC | KL47 (*wzi-*209) | *irp*2*+rmp*A2*+peg*589*+iuc*A*+ter*B*+peg*1631*+rmp*A | MDR |
| CRKP66 | *bla*KPC | KL47 (*wzi-*209) | *irp*2*+rmp*A2*+peg*589*+iuc*A*+ter*B*+peg*1631*+rmp*A*+peg*344 | MDR |
| CRKP67 | *bla*KPC | KL47 (*wzi-*209) | *irp*2*+rmp*A2*+peg*589*+iuc*A*+ter*B*+peg*1631*+rmp*A*+peg*344 | / |
| CRKP68 | *bla*KPC | KL47 (*wzi-*209) | *irp*2*+rmp*A2*+peg*589*+iuc*A*+ter*B*+peg*1631*+rmp*A*+peg*344 | / |
| CRKP69 | *bla*KPC | KL47 (*wzi-*209) | *irp*2*+ter*B | MDR |
| CRKP70 | *bla*NDM | K14.K64 (*wzi-*64) | *irp*2*+rmp*A2*+peg*589*+iuc*A*+ter*B*+peg*1631*+rmp*A*+peg*344 | MDR |
| CRKP71 | *bla*NDM | KL57 (*wzi-*206) | *rmp*A2*+peg*589*+iuc*A*+ter*B*+peg*1631*+rmp*A*+peg*344*+iro*B | / |
| CRKP72 | *bla*KPC+*bla*NDM | K28 (*wzi-*84) | *irp*2*+rmp*A2*+peg*589*+iuc*A*+ter*B*+peg*1631 | MDR |
| CRKP73 | *bla*KPC+*bla*NDM | K46 (*wzi-*223) | *ter*B | / |
| CRKP74 | *bla*KPC+*bla*OXA23 | K14.K64 (*wzi-*64) | *irp*2*+rmp*A2*+peg*589*+iuc*A*+ter*B*+peg*1631*+rmp*A*+peg*344*+iro*B | MDR |
| CRKP75 | *bla*KPC+*bla*OXA23 | K35 (*wzi-*162) | *irp*2 | / |
| CRKP76 | *bla*KPC+*bla*OXA23 | K14.K64 (*wzi-*64) | *irp*2*+rmp*A2*+peg*589*+iuc*A*+ter*B*+peg*1631*+rmp*A*+peg*344 | MDR |
| CRKP77 | *bla*KPC+*bla*OXA23 | K14.K64 (*wzi-*64) | *irp*2*+rmp*A2*+peg*589*+iuc*A*+ter*B*+peg*1631*+rmp*A*+peg*344 | / |
| CRKP78 | *bla*KPC+*bla*OXA23 | K14.K64 (*wzi-*64) | *irp*2*+rmp*A2*+peg*589*+iuc*A*+ter*B*+peg*1631*+rmp*A*+peg*344 | MDR |
| CRKP79 | *bla*KPC+*bla*NDM+*bla*OXA23 | KL102/KL149/KL155 (*wzi-*173) | *irp*2 | MDR |

**Note:** aMDR indicated that the bacterial strain was tested to be non-susceptible to ≥1 agent in ≥3 antimicrobial classes or categories (“/” meant not available).

**Abbreviations:** CRKP, carbapenem-resistant *Klebsiella pneumoniae*; MDR, multidrug-resistant.
